# Supplementary material for: β-Cell Function Declines Within the First Year Postpartum in Women With Recent Glucose Intolerance in Pregnancy
Source: PubMed Central journal article supplement — Diabetes Care. 2010 Aug;33(8):1798–804. doi: 10.2337/dc10-0351 (PMC2909065; doi:10.2337/dc10-0351), 2010-08
Supplement: supp_dc10-0351_onlineappendix.pdf [file supp_dc10-0351_onlineappendix.pdf]

## SUPPLEMENTAL FIGURES

**Online Figure 1:** Prevalence of dysglycemia (pre-diabetes or diabetes) within each gestational glucose tolerance group at 3-months and 12-months postpartum

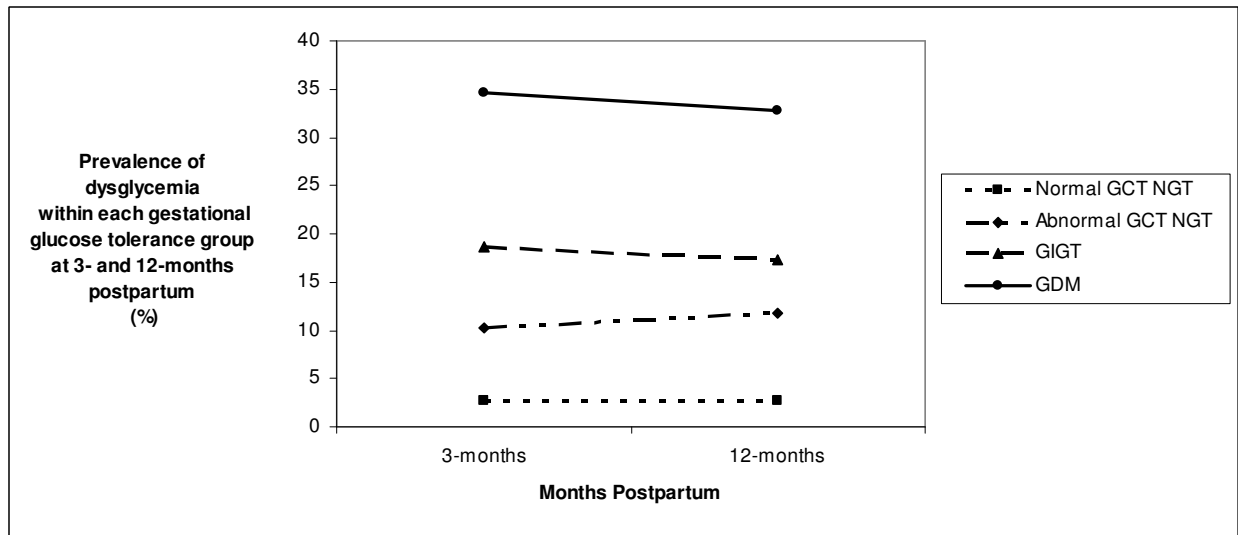

**Online Figure 2:** Baseline-adjusted changes in insulin sensitivity, measured by 1/HOMA-IR (Panel A), and beta-cell function, measured by insulinogenic index/HOMA-IR (Panel B), between 3- and 12-months postpartum by gestational glucose tolerance group

**Panel A: Baseline-adjusted change in insulin sensitivity (1/HOMA-IR)**

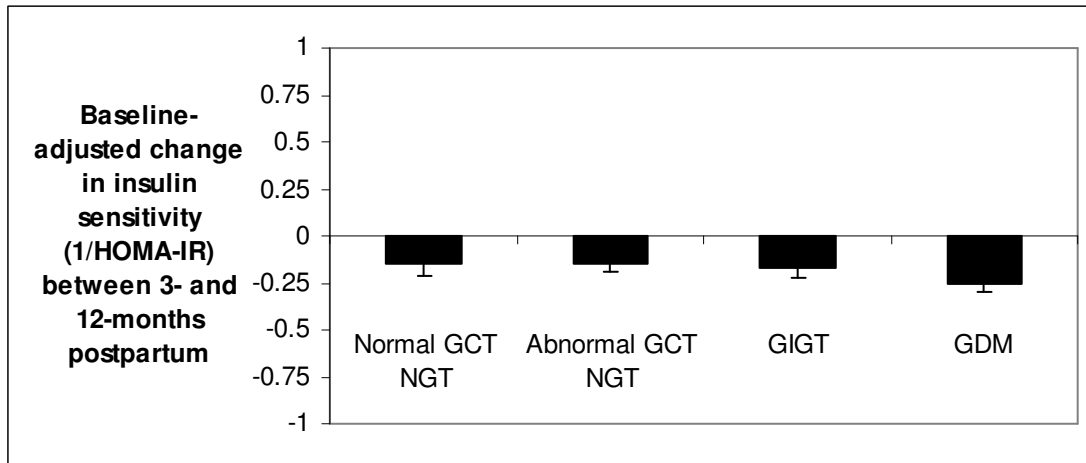

overall p=0.3928

**Panel B: Baseline-adjusted change in beta-cell function (insulinogenic index/HOMA-IR)**

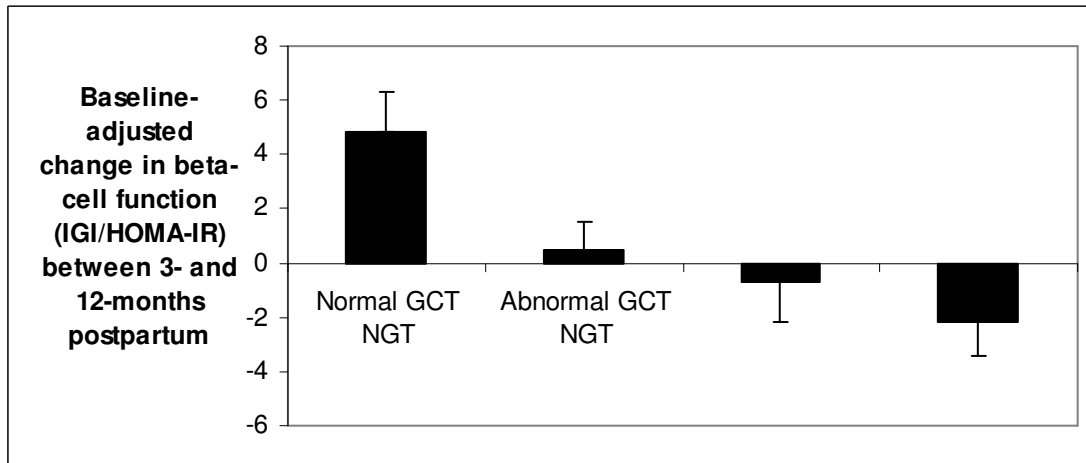

overall p=0.0036
